# Supplementary material
Source: publisher figshare collection journal article supplement (https://gsajournals.figshare.com/articles/dataset/_/14787933)

**A**

Single-stranded dDNA enables edits, but **Target** is still disrupted

Uncontrolled mutations disrupt **Target** to maintain cell viability

gDNA: Feature, Target

RGN: Spacer, Scaffold

Restriction

gDNA: Feature, Target, get

HDR

gDNA: Feature, \*Target

NHEJ

gDNA: Feature, \*Target

HDR

gDNA: Feature, \*Target

NHEJ

gDNA: Feature, \*Target

**B**

Double-stranded dDNA cannot produce intended edits, and **Target** is still disrupted

gDNA: Feature, Target

RGN: Spacer, Scaffold

Restriction

gDNA: Feature, Target, get

HDR

gDNA: Feature, \*Target

NHEJ

gDNA: Feature, \*Target

HDR

gDNA: Feature, \*Target

NHEJ

gDNA: Feature, \*Target

Double-stranded dDNA cannot produce intended edits, and **Target** is still disrupted

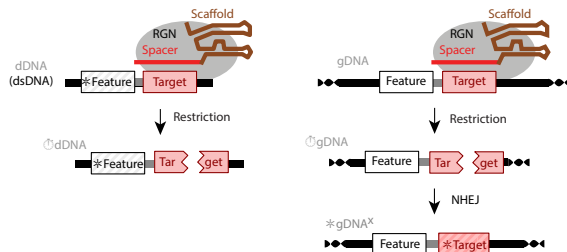

Figure S2

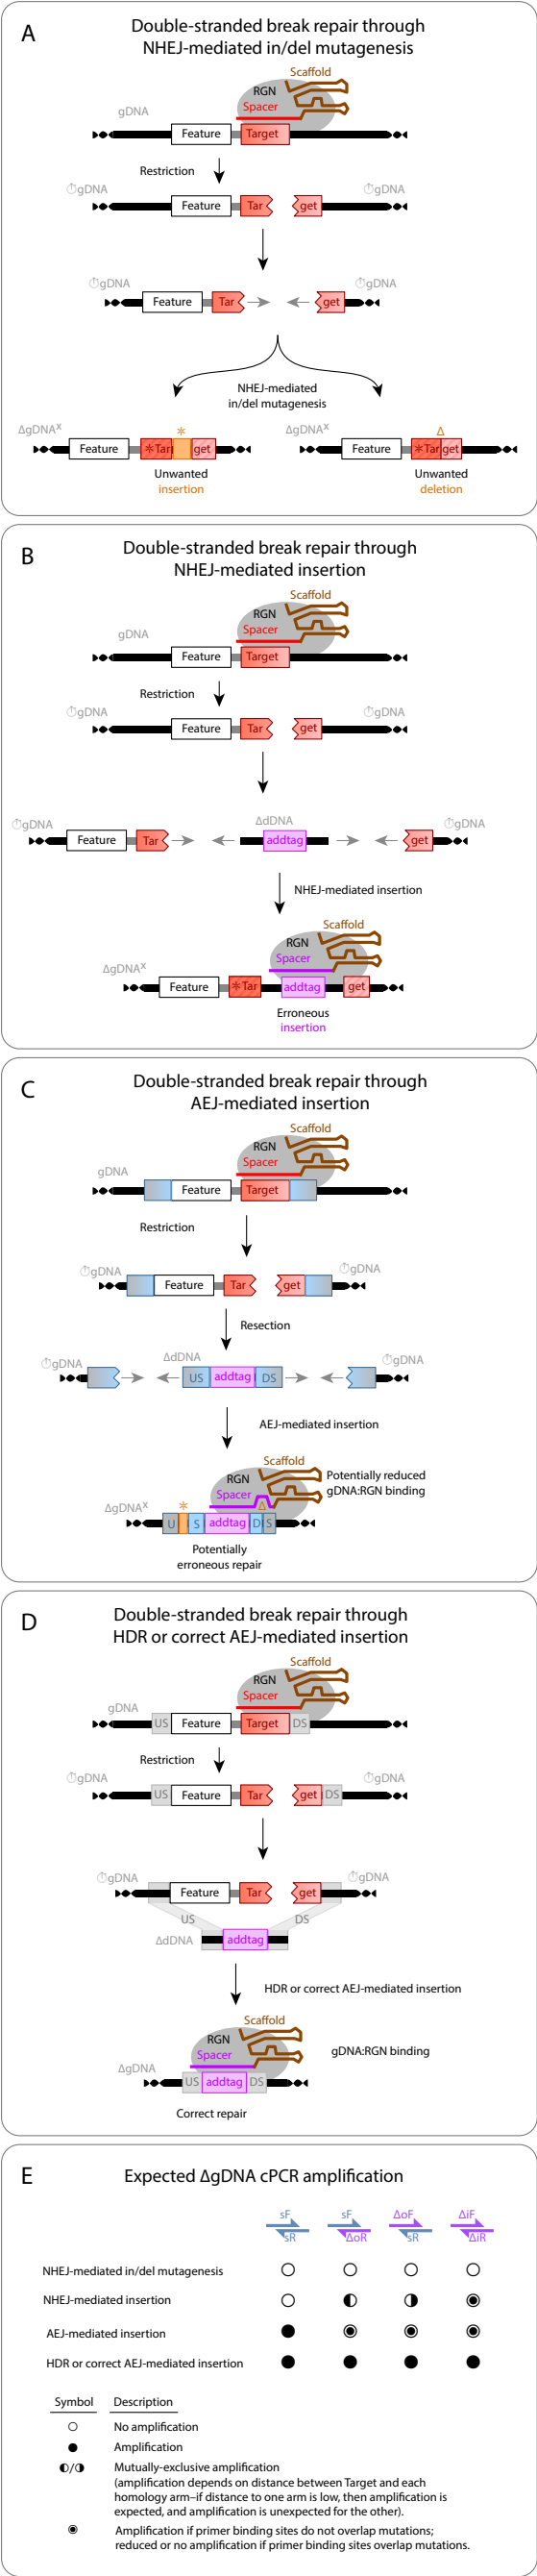

Figure S3

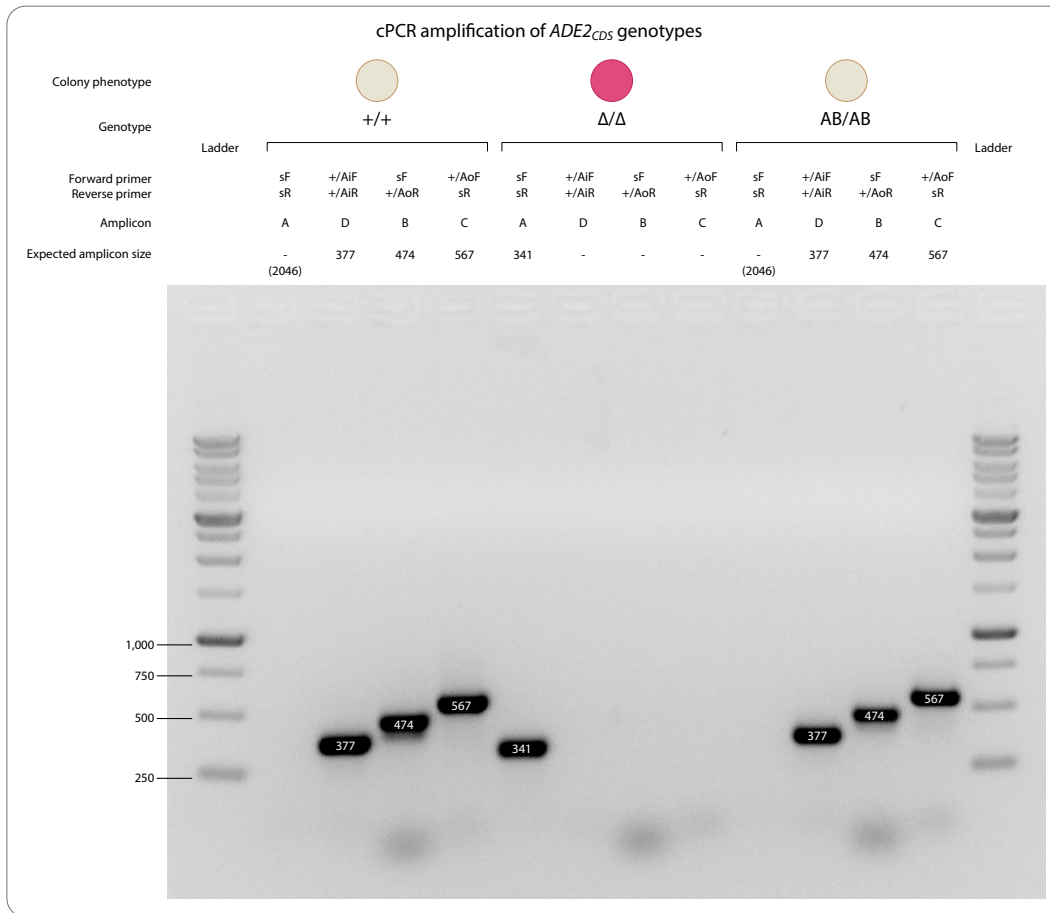

Figure S4

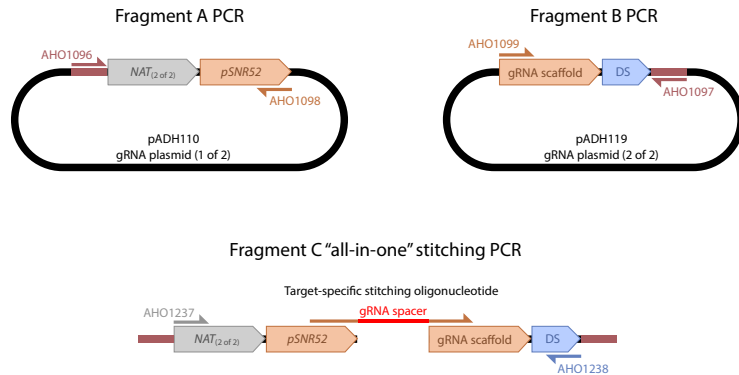

Figure S5

A Sequencing results of edited *WOR1<sub>Usd</sub>* by indirect (2-step) AddTag method

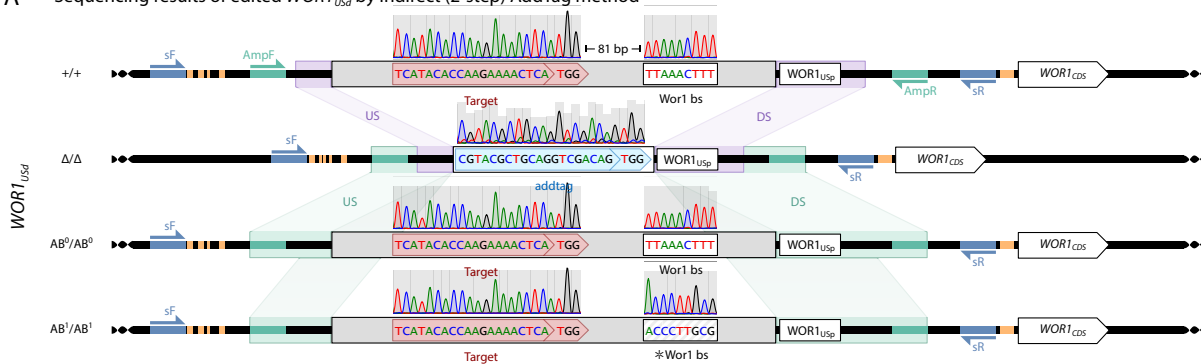

B Sequencing results of edited *WOR1<sub>Usd</sub>* by indirect (2-step) AddTag method

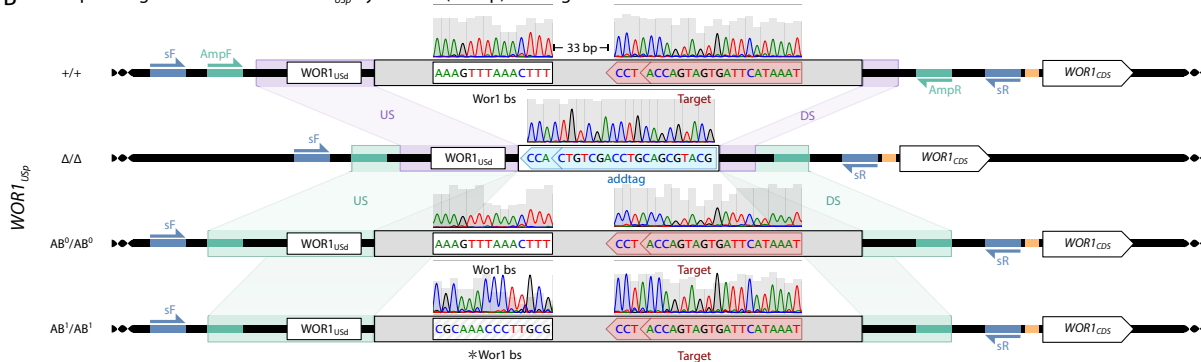

Figure S6

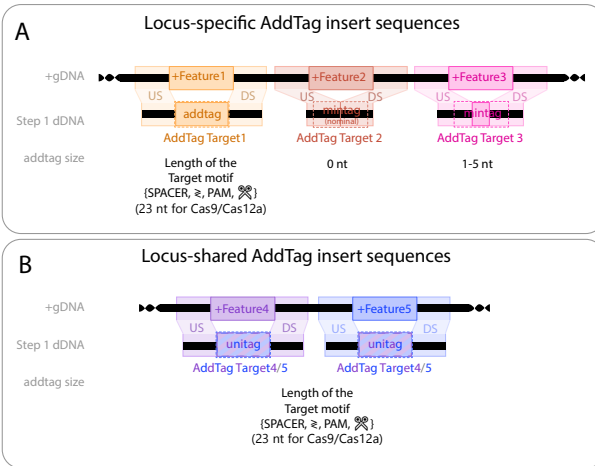

Figure S7

*A priori* weight functions for on-target Algorithm scores

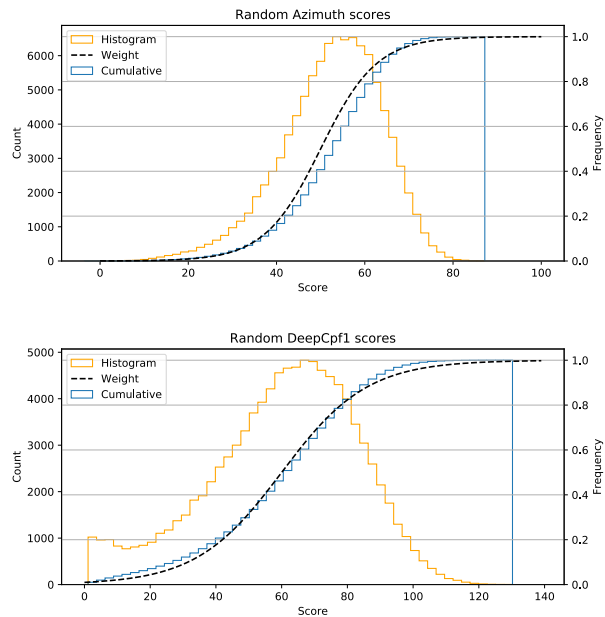

Figure S8

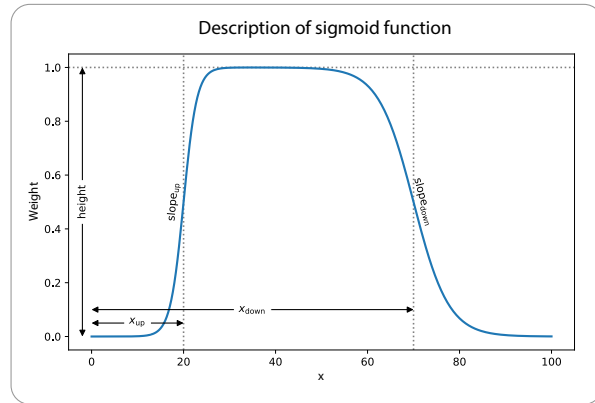



Figure S9

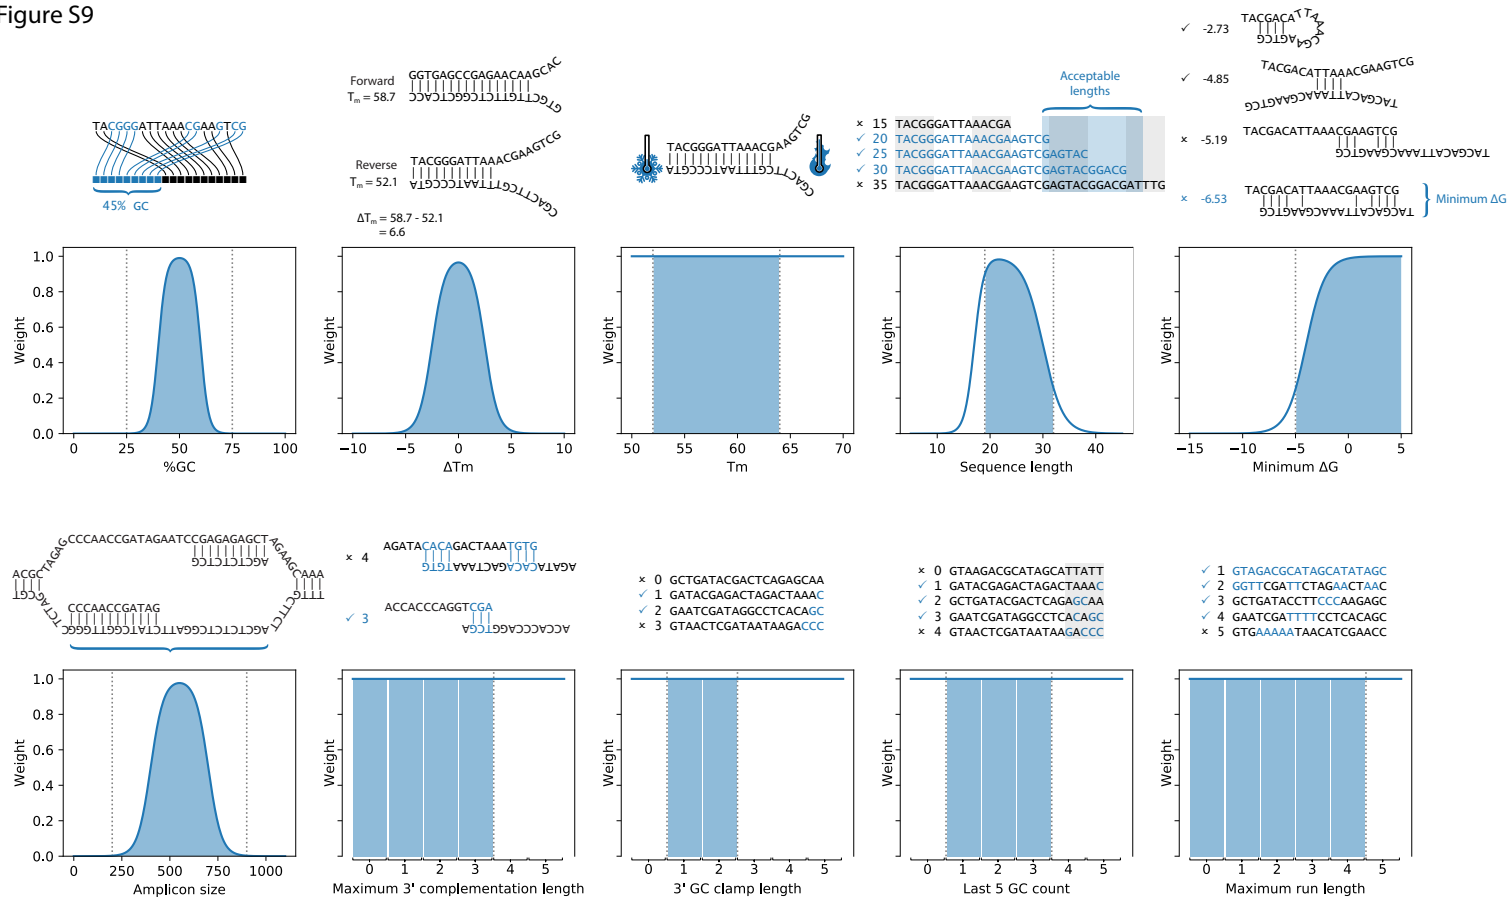

Figure S10

### A Excessive homology within dDNA reduces efficiency of intended dDNA incorporation

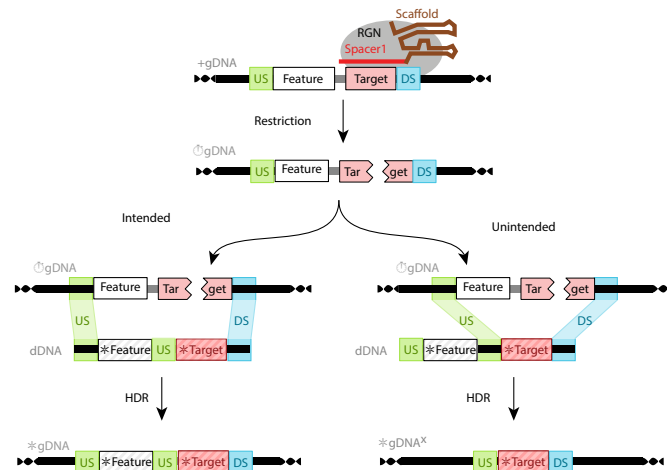

### B Excessive homology within gDNA reduces efficiency of intended dDNA incorporation

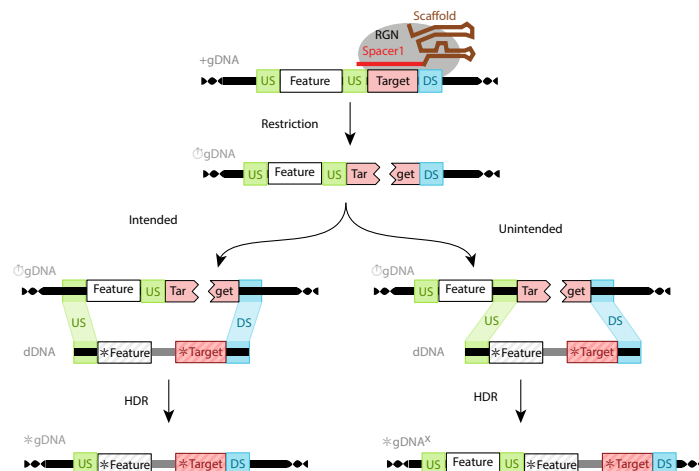

### C Excessive homology in long dDNA reduces efficiency of combinatorial direct (1-step) traditional editing

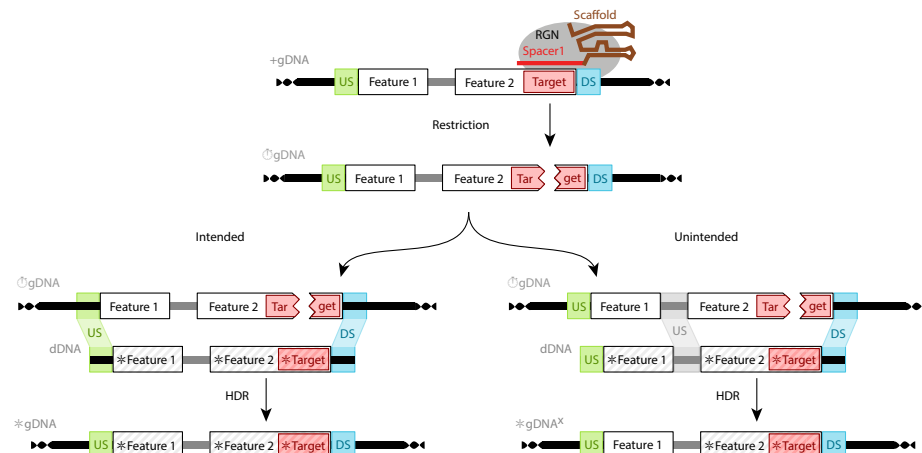

Figure S11

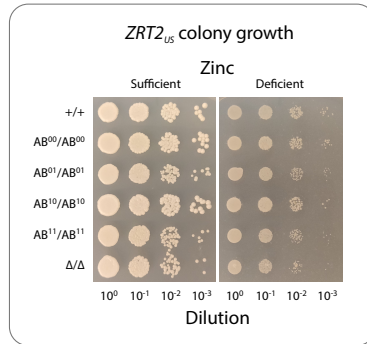

Figure S12

**A AddTag method (add-back at Native locus); Phenotype caused by Gene**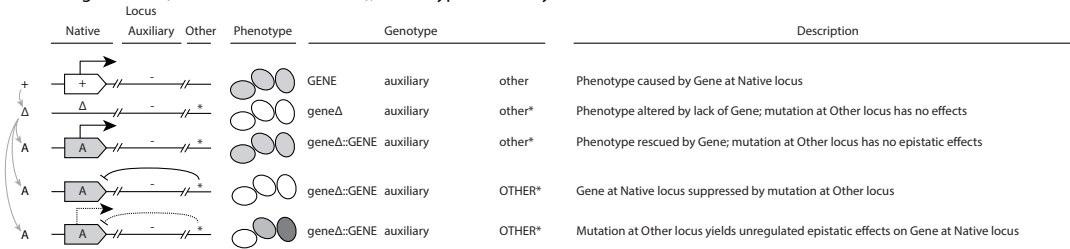**B Traditional method (add-back at Auxiliary locus); Phenotype caused by Gene**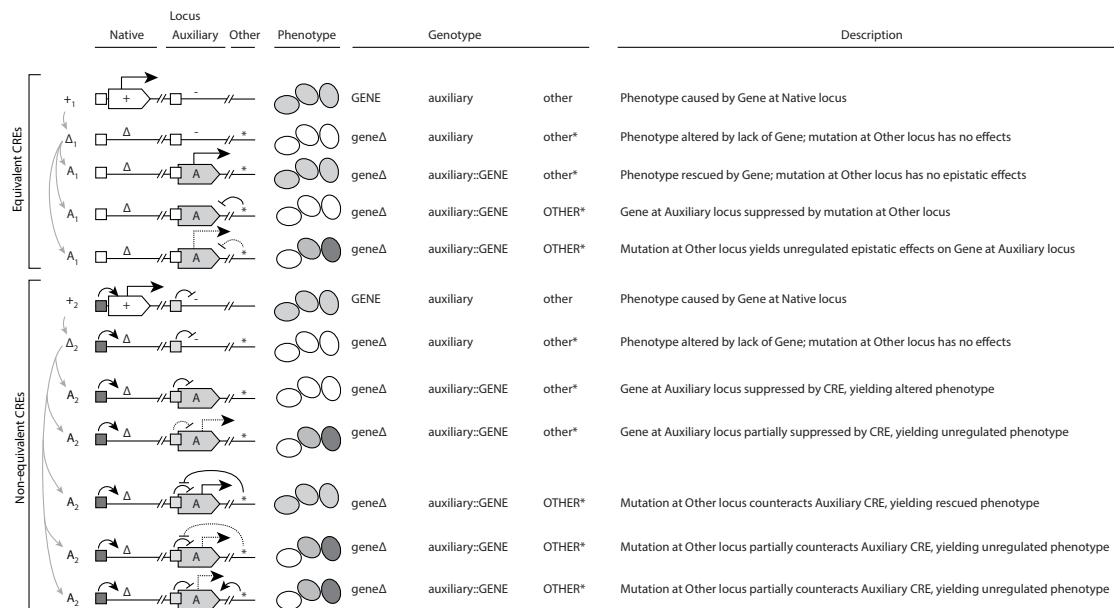**C AddTag method (add-back at Native locus); Phenotype caused by Other locus**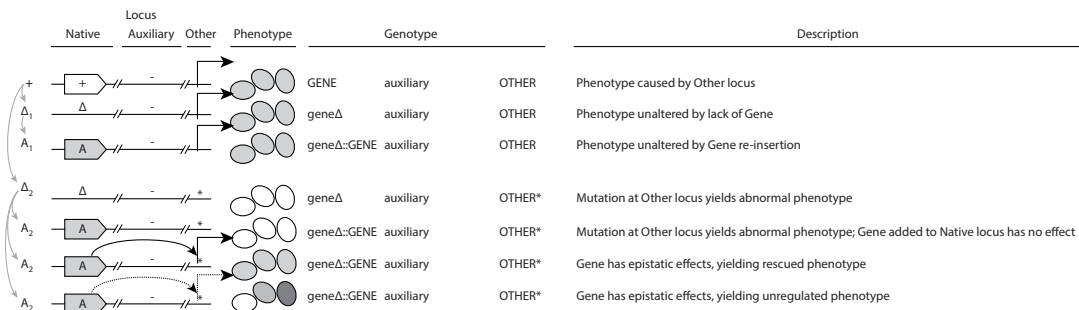**D Traditional method (add-back at Auxiliary locus); Phenotype caused by Other locus**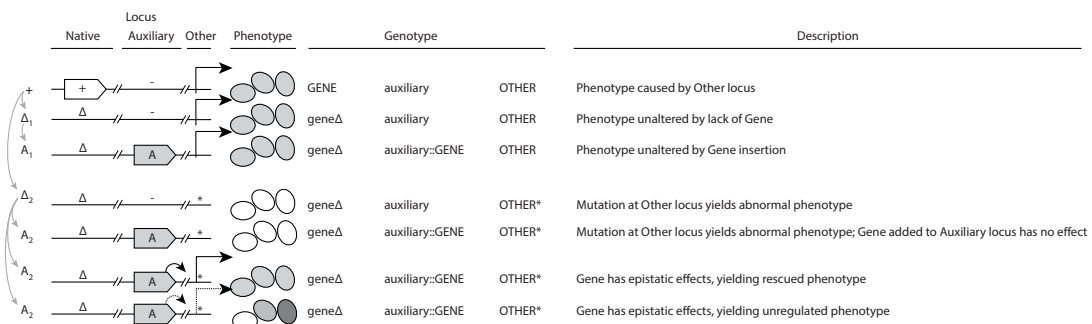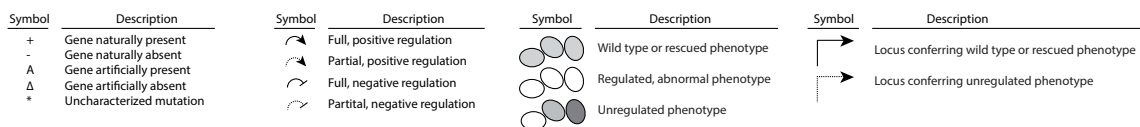

Figure S13

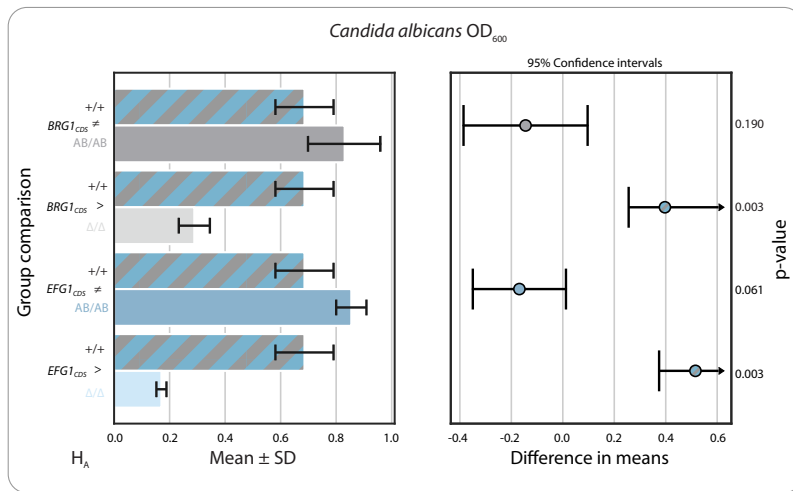

Figure S14

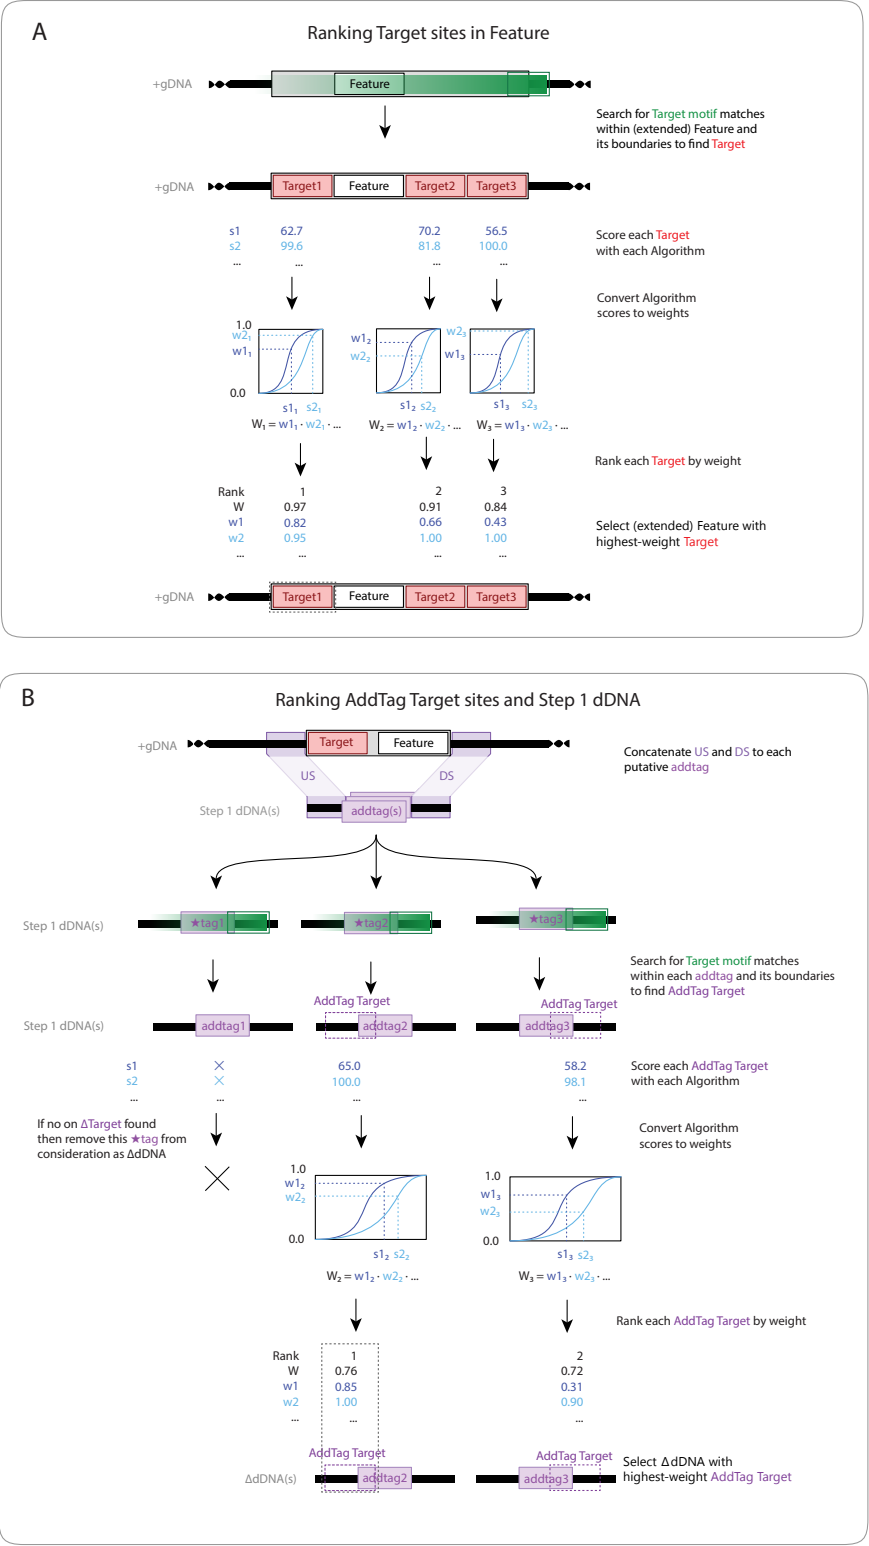

Figure S15

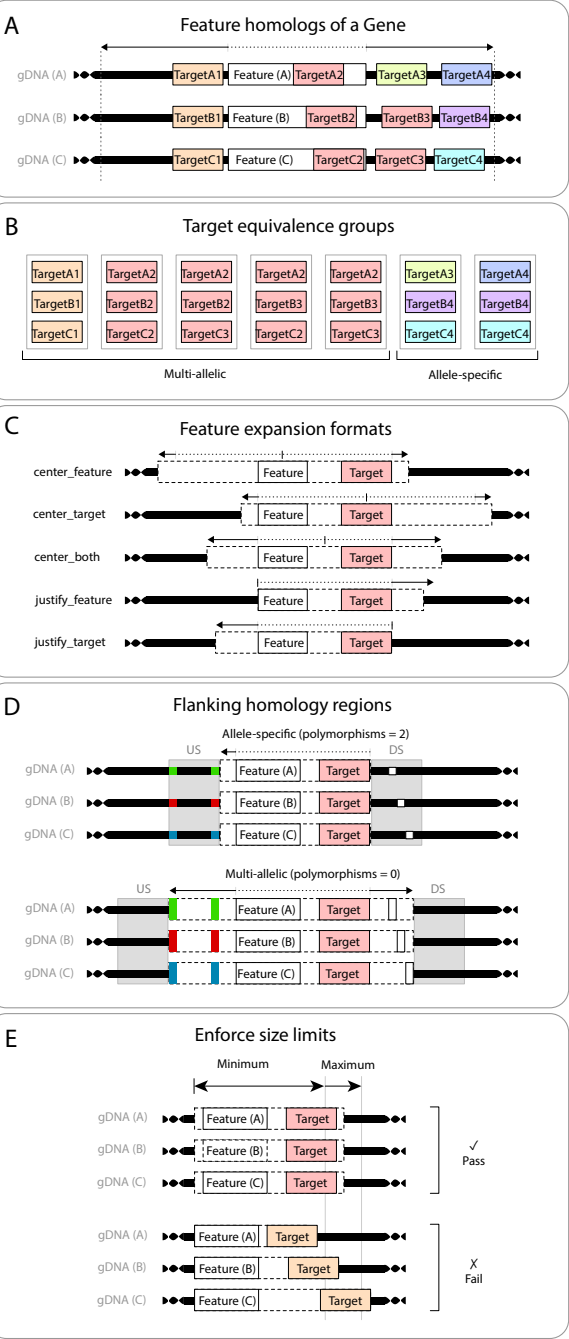

Figure S16

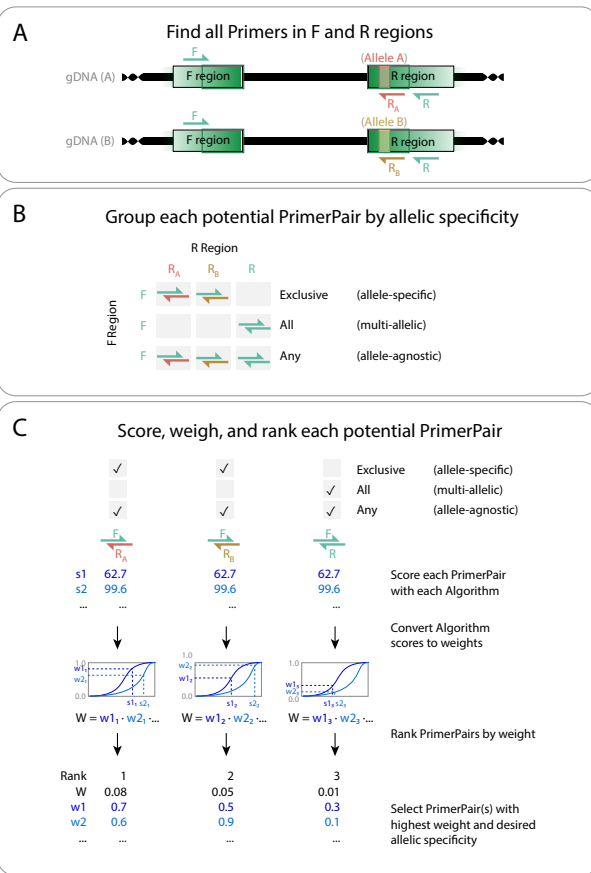

Supplement: Supplementary file 1 [file 1]
